# Supplementary material for: In vivo nuclear RNA structurome reveals RNA-structure regulation of mRNA processing in plants
Source: PubMed Central journal article supplement (PMC7784297; doi:10.1186/s13059-020-02236-4), 2021-01-04
Supplement: 13059_2020_2236_MOESM1_ESM.pdf [file 13059_2020_2236_MOESM1_ESM.pdf]

Additional File 1: Supplementary figures for  
***In vivo* nuclear RNA structurome reveals RNA-structure regulation of mRNA processing  
in plants**

Zhenshan Liu, Qi Liu, Xiaofei Yang, Yueying Zhang, Matthew Norris, Xiaoxi Chen, Jitender  
Cheema, Huakun Zhang, Yiliang Ding

File list:

**Figure S1.** Assessment of nucleus isolation.

**Figure S2.** The step-by-step procedure of SHAPE-Structure-Seq library construction.

**Figure S3.** Summary of SHAPE-Structure-Seq libraries.

**Figure S4.** High reads coverages of the nuclear SHAPE-Structure-Seq libraries.

**Figure S5.** Average Pearson correlation coefficient (PCC) of SHAPE reactivities between the two biological replicates of the *in vivo* nuclear and cytosolic SHAPE-Structure-Seq libraries for mRNAs with different RT-stop reads counts.

**Figure S6.** Comparison of SHAPE reactivity profiles with previously published mRNA secondary structure models.

**Figure S7.** The high enrichment of pre-mRNAs in the nuclear SHAPE-Structure-Seq libraries.

**Figure S8.** The formula for calculating the splicing efficiency and the identification of spliced and unspliced events.

**Figure S9.** Similar nucleotide composition between spliced and unspliced events.

**Figure S10.** Heatmaps showing the SHAPE reactivities across 5'ss for spliced and unspliced events.

**Figure S11.** SHAPE reactivity and unpaired probability profiles of the two biological replicates across 5' splice site.

**Figure S12.** The SHAPE reactivity values across the 5'ss of the first intron of *AT5G56870*

**Figure S13.** Minimum free energy RNA structure at the 5'ss of *AT5G56780* intron 1 folded by *RNAfold*.

**Figure S14.** The two-nucleotide single-stranded RNA structure feature at -1 and -2 nt positions upstream of 5'ss can regulate splicing on the genes *AT1G08450* and *AT3G08930*.

**Figure S15.** Comparison of reads coverage across poly(A) site between nuclear and cytosolic mRNA libraries.

**Figure S16.** Similar nucleotides composition between the poly(A) sites and the control sites.

**Figure S17.** A similar but weaker structure feature across the alternative polyadenylation sites.

**Figure S18.** An accumulation of the conventional polyadenylation signal (PAS) motif "AAUAAA" in the -28 nt to -17 nt upstream of the poly(A) sites.

**Table S1.** Summary of reads mapping for each library.

**Table S2.** Comparison between SHAPE reactivity profiles and phylogenetic U1 and U12 snRNA structures.

**Table S3.** Summary of primer sequences.

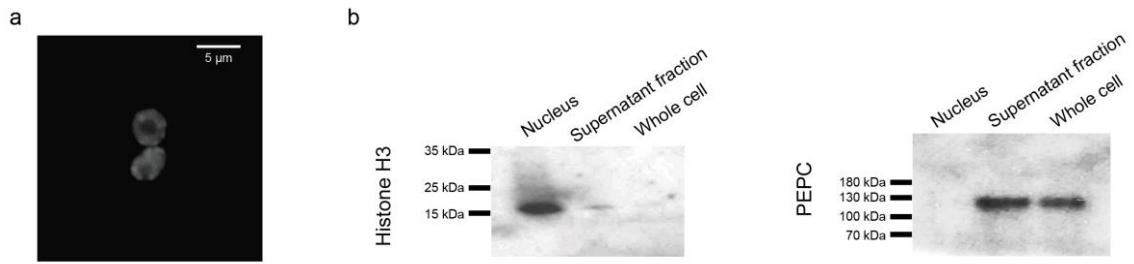

**Figure S1. Assessment of nucleus isolation.**

**a**, The microscopy image of isolated nuclei with DAPI staining is shown. The nuclei remain completely intact. **b**, The western blot of the extracted proteins from isolated nuclei, cytosolic supernatant fraction and whole cells is shown for detecting the histone H3 and cytoplasm specific protein PEPC. The high enrichment of histone H3 and the absence of PEPC indicates the purity of the isolated nucleus.

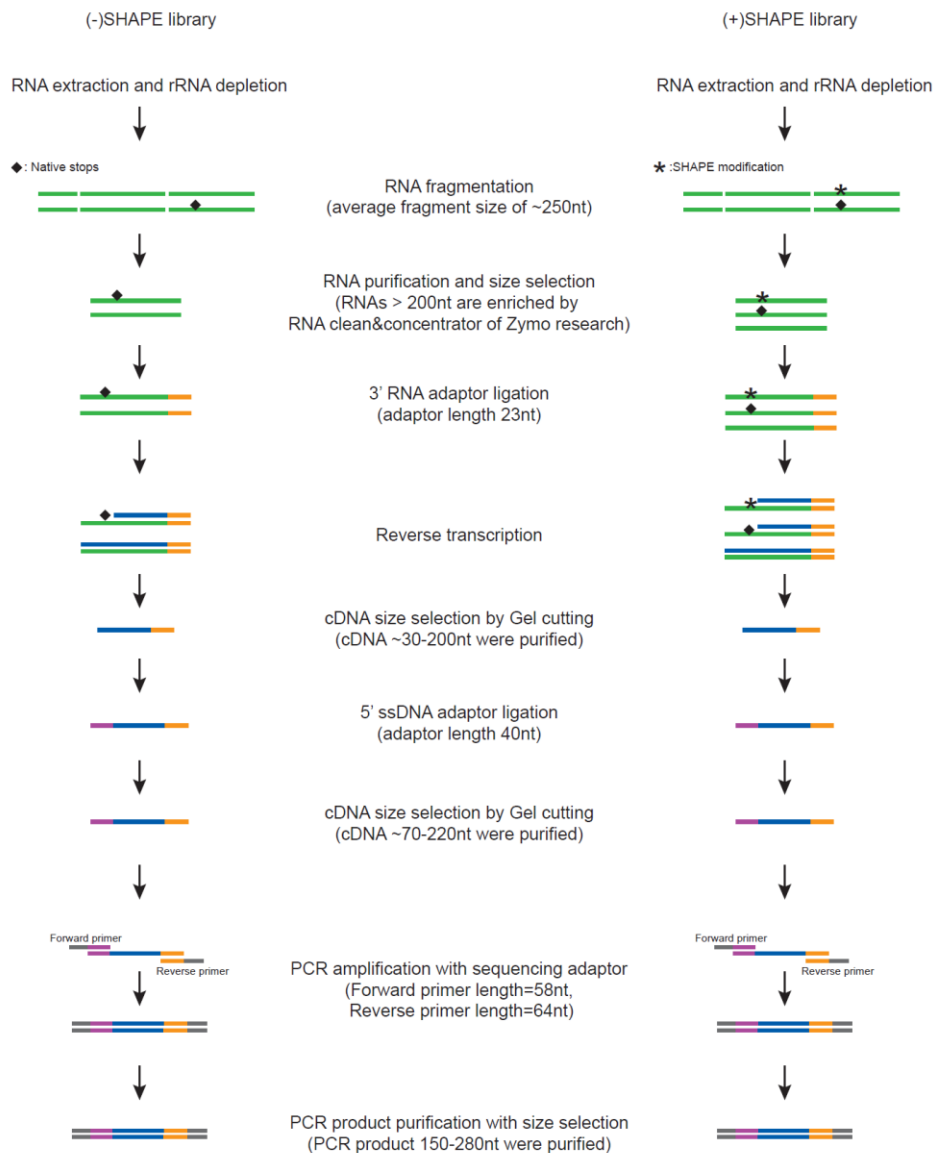

**Figure S2. The step-by-step procedure of Nuc-SHAPE-Structure-Seq library construction.**

Both (-)SHAPE and (+)SHAPE Structure-Seq libraries were constructed using the same procedure. After RNA extraction and ribosomal RNA depletion, RNA fragmentation was performed and yielded an average fragment size of ~250nt. RNA clean and concentrator was used to purify and recover the RNA fragments with length >200nt. Following RNA purification and recovery, 3' dephosphorylation and 3' RNA adaptor ligation was performed. Following reverse transcription, the first round of 10% TBE-Urea gel purification was performed. The size from between 30nt (longer than the size of 3' adaptor) to 200nt (~20 nt less than the smallest RNA fragment size plus the size of 3' adaptor) was selected. The size-selected cDNAs were then purified and ligated with the 5' ssDNA adaptor. After ligation, a second round of 10% TBE-Urea gel purification was performed to select the size from between 70nt (the smallest cDNA size plus the size of 5' adaptor) to 220 nt (the largest cDNA size plus the size of 5' adaptor). PCR reaction and agarose gel purification were performed. The dsDNA libraries with the size ranging from 150 nt (the smallest ligated cDNA size plus PCR primers size) to 280nt (the largest ligated cDNA size plus PCR primers size) were subjected to the deep sequencing. Black diamond represents native stop, black asterisk represents SHAPE chemical modification.

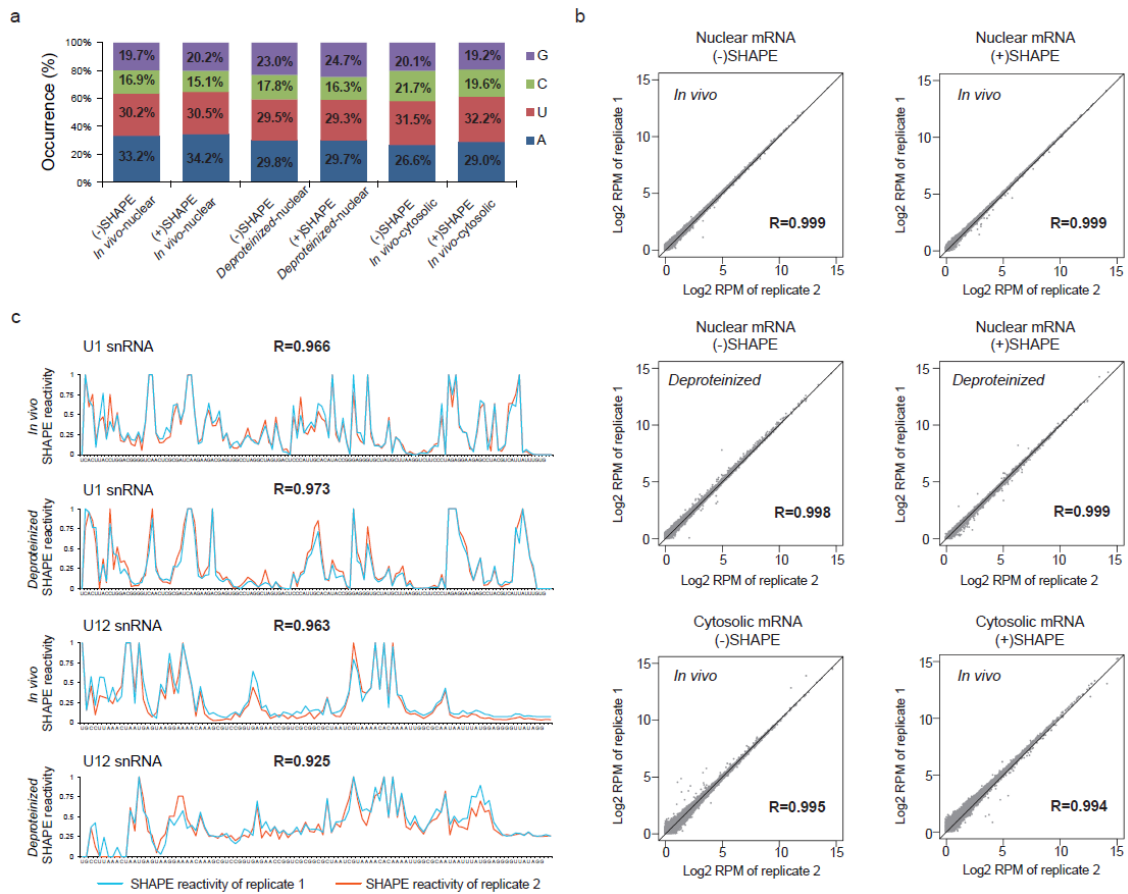

**Figure S3. Summary of SHAPE-Structure-Seq libraries.**

**a**, Nucleotide modification in both (+)SHAPE and (-)SHAPE libraries are highly concordant, with a slight enrichment in (+)SHAPE for As and Us over Cs and Gs as expected. Nucleotide occurrences are shown in both (+)SHAPE and (-)SHAPE libraries for *in vivo* nuclear SHAPE-Structure-Seq, *deproteinized* nuclear SHAPE-Structure-Seq and *in vivo* cytosolic SHAPE-Structure-Seq. **b**, Correlation of gene expression abundance between the two biological replicates for *in vivo* nuclear SHAPE-Structure-Seq, *deproteinized* nuclear SHAPE-Structure-Seq and *in vivo* cytosolic SHAPE-Structure-Seq. High correlations of gene expression abundance indicate high reproducibility between the two biological replicates. RPM: reads per million mapped reads. Pearson correlation coefficients are shown for each comparison. **c**, Correlation of SHAPE reactivity values between the two biological replicates for U1 and U12 snRNA in *in vivo* and *deproteinized* nuclear SHAPE-Structure-Seq. High SHAPE reactivity correlations indicate high reproducibility of SHAPE modification between the two biological replicates. Pearson correlation coefficients are shown for each comparison.

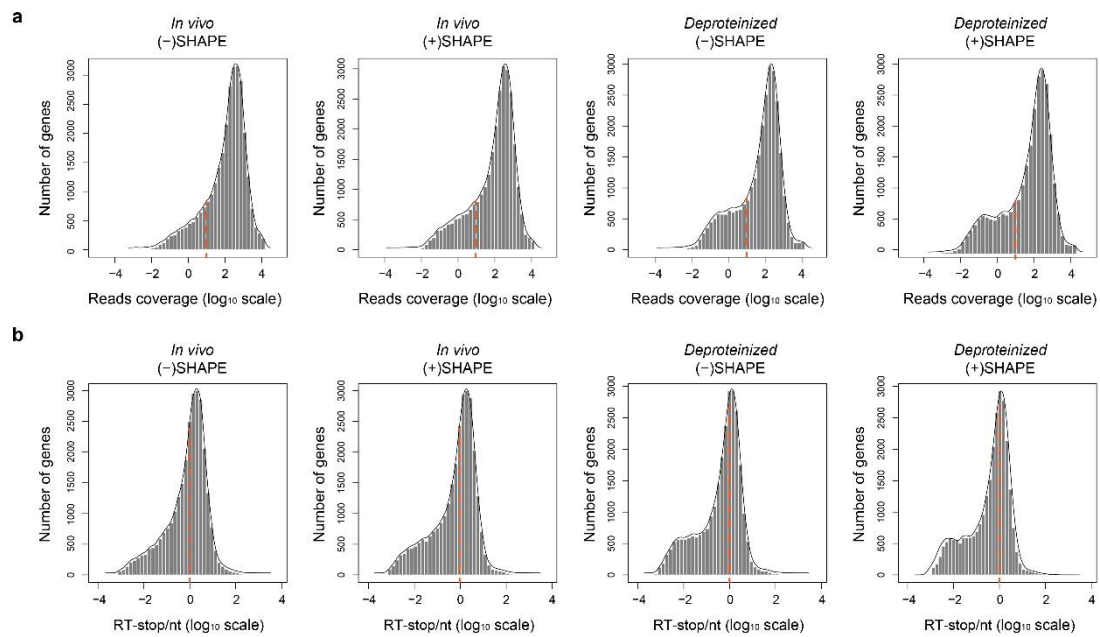

**Figure S4. High reads coverage of the nuclear SHAPE-Structure-Seq libraries.**

**a**, Over 25,051 and 22,945 genes have the sequencing reads coverage for more than 10 reads per nucleotide for (-)SHAPE and (+)SHAPE libraries in the *in vivo* nuclear SHAPE-Structure-Seq respectively. Over 20,752 and 21,141 genes have the sequencing reads coverage for more than 10 reads per nucleotide for (-)SHAPE and (+)SHAPE libraries in the *deproteinized* nuclear SHAPE-Structure-Seq respectively. **b**, Over 17,441 and 16,084 genes have more than one RT stop per nucleotide for (-)SHAPE and (+)SHAPE libraries in the *in vivo* nuclear SHAPE-Structure-Seq respectively. Over 12,366 and 13,791 genes have more than one RT stop per nucleotide for (-)SHAPE and (+)SHAPE libraries in the *deproteinized* nuclear SHAPE-Structure-Seq respectively.

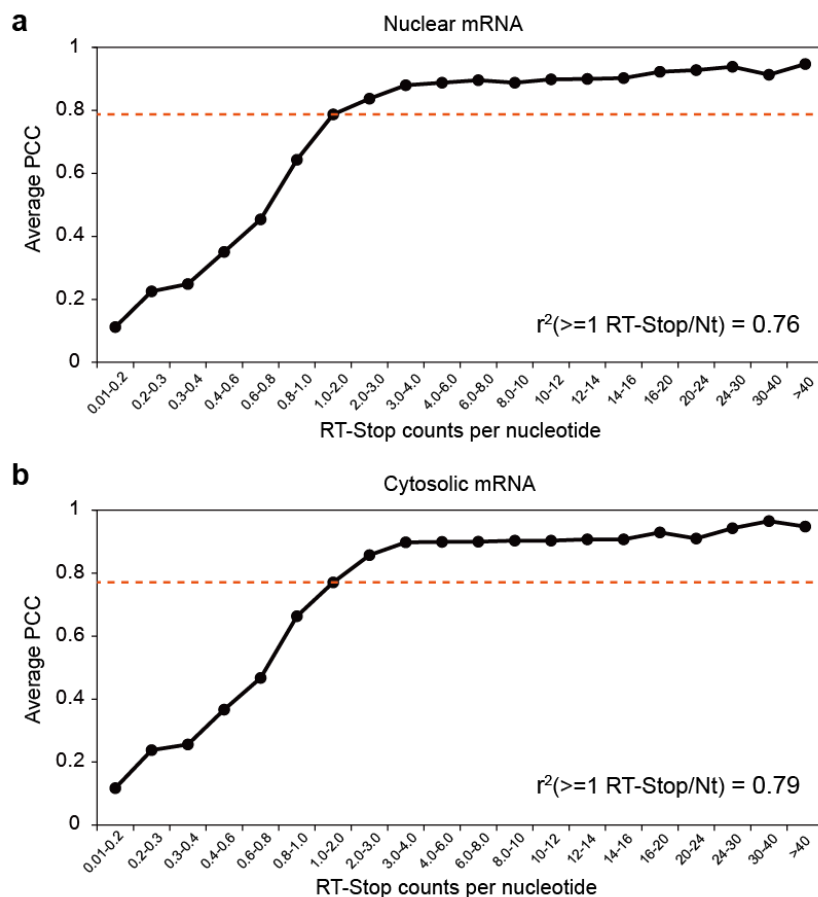

**Figure S5. Average Pearson correlation coefficient (PCC) of SHAPE reactivities between the two biological replicates of the *in vivo* nuclear and cytosolic SHAPE Structure-seq libraries for mRNAs with different RT-stop reads counts.**

Average Pearson correlation coefficient (PCC) values are shown for transcripts with different sequencing depth (reverse transcription stop (RT-stop) counts per nucleotide) in both *in vivo* nuclear (**a**) and cytosolic SHAPE-Structure-Seq libraries (**b**). The dash lines indicate the threshold of more than one RT-stop count per nucleotide. The  $r^2$  of the average PCC for mRNAs with more than one RT-stop count per nucleotide was shown in each plot.

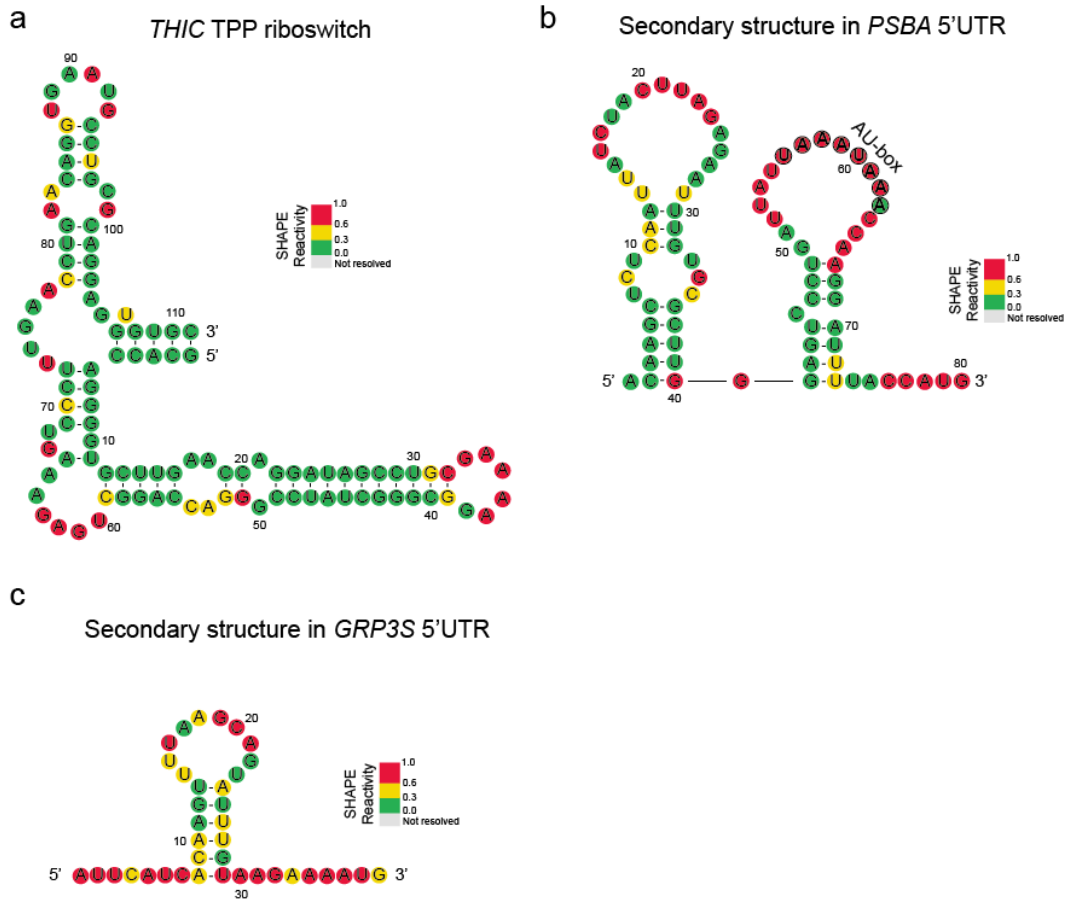

**Figure S6. Comparison of SHAPE reactivity profiles with previously published mRNA secondary structure models.**

**a**, The evolutionary conserved RNA secondary structure model of *Arabidopsis THIC* pre-mRNA (TPP (thiamin pyrophosphate) riboswitch) before splicing [1]. *In vivo* SHAPE reactivity values from our Nuc-SHAPE-Structure-Seq agree well with the structure model. Nucleotides were colour-coded according to *in vivo* SHAPE reactivity values (SHAPE reactivity 0.6-1.0 marked in red, 0.3-0.6 marked in yellow, 0-0.3 marked in green). **b**, A *in vivo* RNA secondary structure model in the 5'UTR of Arabidopsis chloroplast gene *PSBA* (*ATCG00020*). SHAPE reactivity values from our SHAPE-Structure-Seq agree with the previously-identified structure model. The AU-box (denoted by circled nucleotides) was found to be single-stranded, which is consistent with previous study [2]. **c**, A *in vivo* secondary structure model in the 5'UTR of *Arabidopsis GRP3S* (*AT2G05380*) determined by DMS-LMPCR in a previous study [2]. SHAPE reactivity values from our SHAPE-Structure-Seq agree with the structure model.

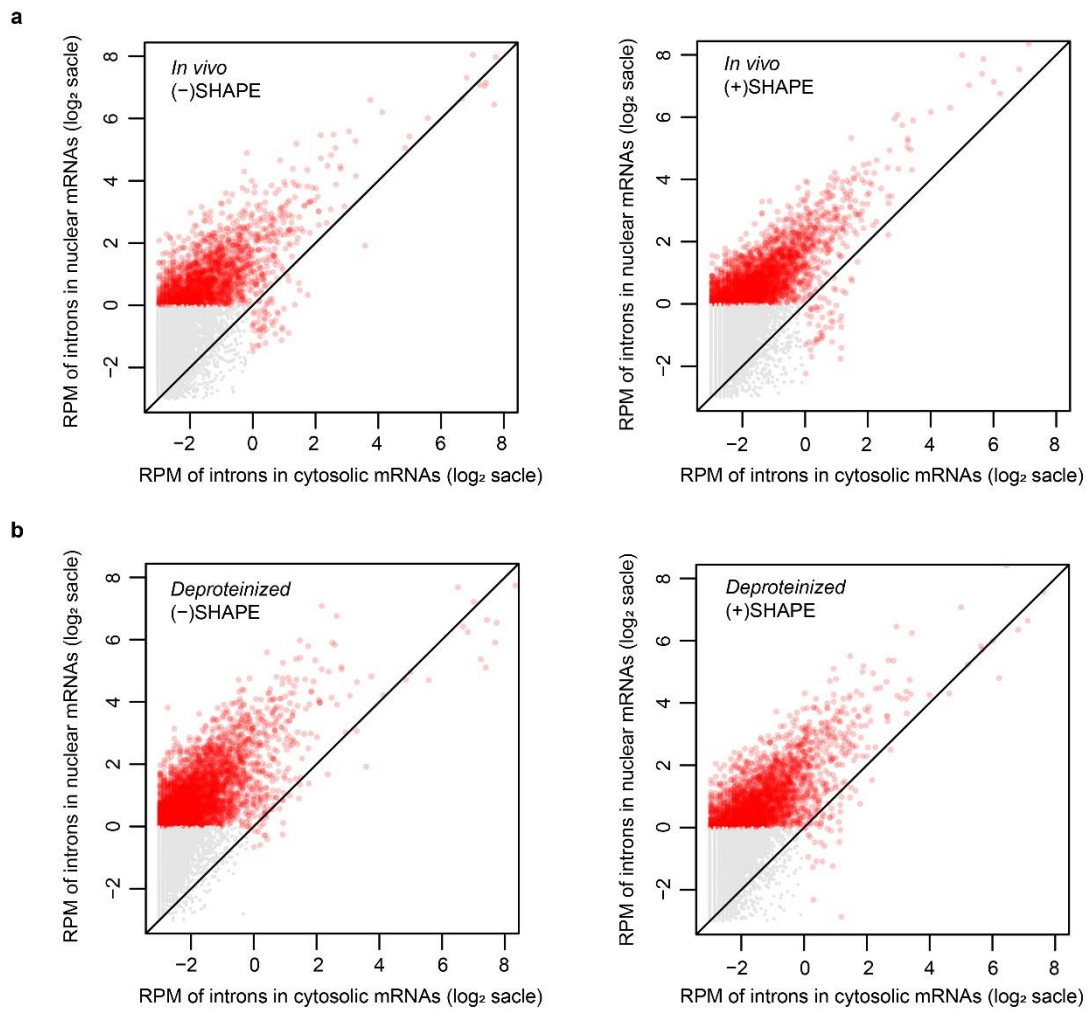

**Figure S7. The high enrichment of pre-mRNAs in the nuclear SHAPE-Structure-Seq libraries.**

Comparisons of the expression abundance for constitutively spliced introns between nuclear and cytosolic mRNAs in both (-)SHAPE and (+)SHAPE libraries for *in vivo* (**a**) and *deproteinized* (**b**) nuclear SHAPE-Structure-Seq. RPM: reads per million mapped reads. Introns with  $\text{RPM} < 1$  (low expression) in both nuclear mRNA and cytosolic mRNA libraries are colored in grey. Introns with  $\text{RPM} \geq 1$  (high expression) in either nuclear mRNA or cytosolic mRNA libraries are colored in red. Introns are high enriched in our nuclear SHAPE-Structure-Seq libraries compared to cytosolic SHAPE-Structure-Seq libraries.



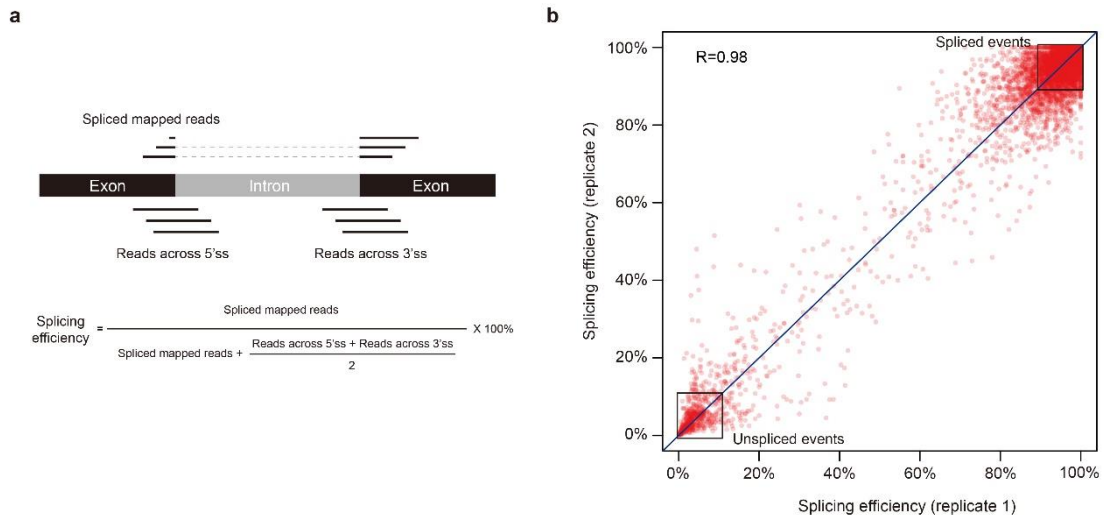

**Figure S8. The formula for calculating the splicing efficiency and the identification of spliced and unspliced events.**

**a**, The formula for calculating the splicing efficiency is shown. Higher splicing efficiency represents that the intron is more efficiently removed from pre-mRNA. **b**, The identification of spliced and unspliced events. Splicing efficiency calculated from the two biological replicates are shown. High correlation between these two replicates is observed (Pearson correlation coefficient = 0.98). Most of the introns show either very high splicing efficiency ( $\geq 90\%$ ) or very low splicing efficiency ( $\leq 10\%$ ). Two groups of splicing events were identified: spliced events (splicing efficiency  $\geq 90\%$ ) and unspliced events (splicing efficiency  $\leq 10\%$ ), which are highlighted in black box.

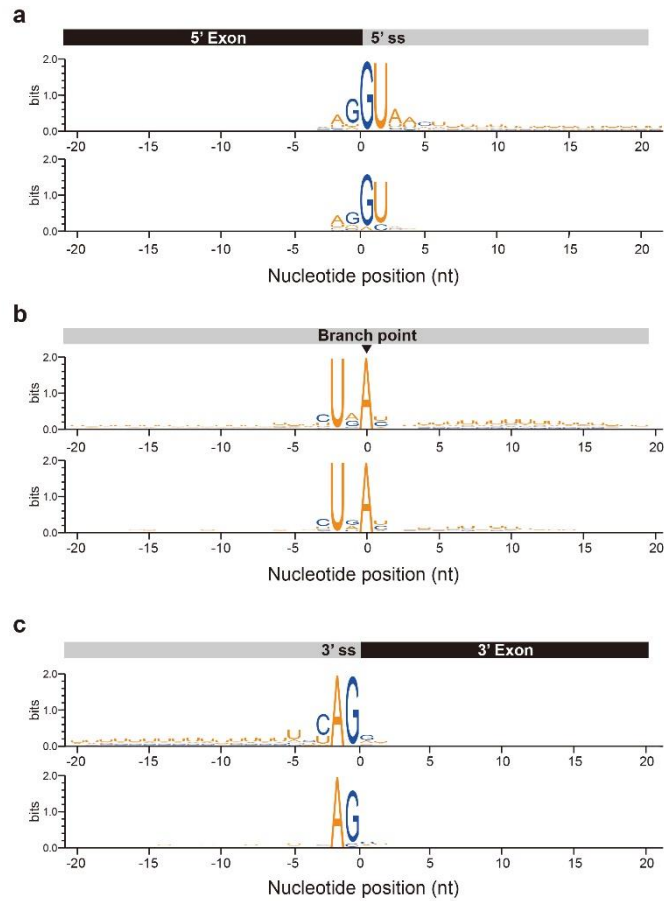

**Figure S9. Similar nucleotide composition between spliced and unspliced events.**

Nucleotide composition across 5'ss (a), branch point (b) and 3'ss (c) between spliced (top) and unspliced (bottom) events are shown.

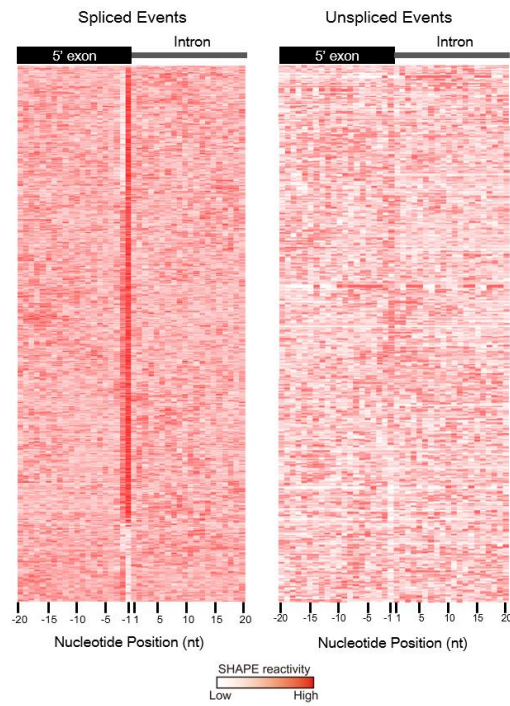

**Figure S10. Heatmaps showing the SHAPE reactivities across 5'ss for spliced and unspliced events.**

*In vivo* SHAPE reactivities across 5'ss were color coded for each individual mRNAs and shown in heatmaps. The gradient color from light to dark red represents SHAPE reactivities from low to high.

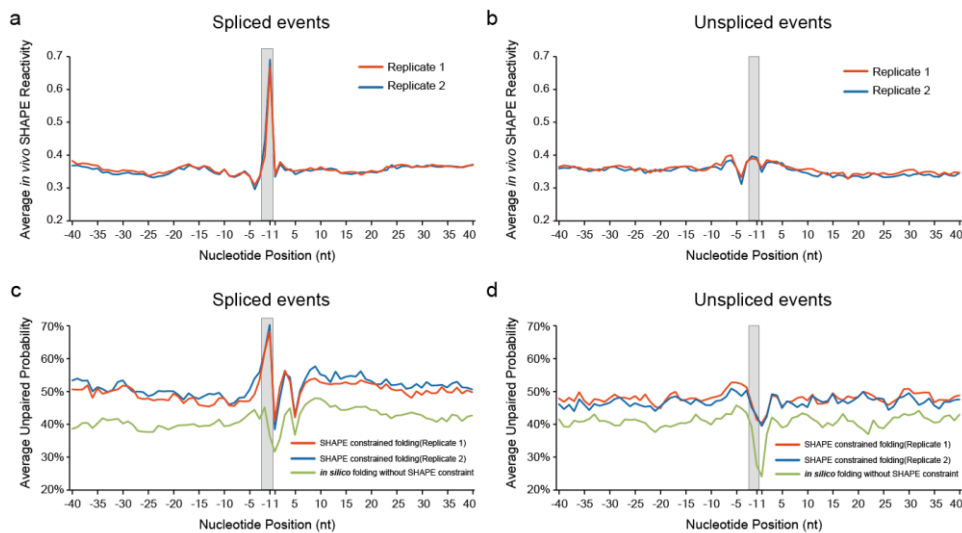

**Figure S11. SHAPE reactivity and unpaired probability profiles of the two biological replicates across 5' splice site.**

SHAPE reactivity profiles of the two biological replicates across 5'ss were plotted for spliced events (a) and unspliced events (b). SHAPE reactivity constrained and non-SHAPE constrained RNA structure folding was performed. Unpaired probability profiles across 5'ss derived from the SHAPE constrained RNA structures and the non-SHAPE constrained RNA structures were shown for spliced events (c) and unspliced events (d). The 100nt sequences flanking 5'ss were used in RNA structure folding by *RNAfold* in Vienna package [3]. The -1 and -2 positions upstream of 5'ss are shaded in grey.

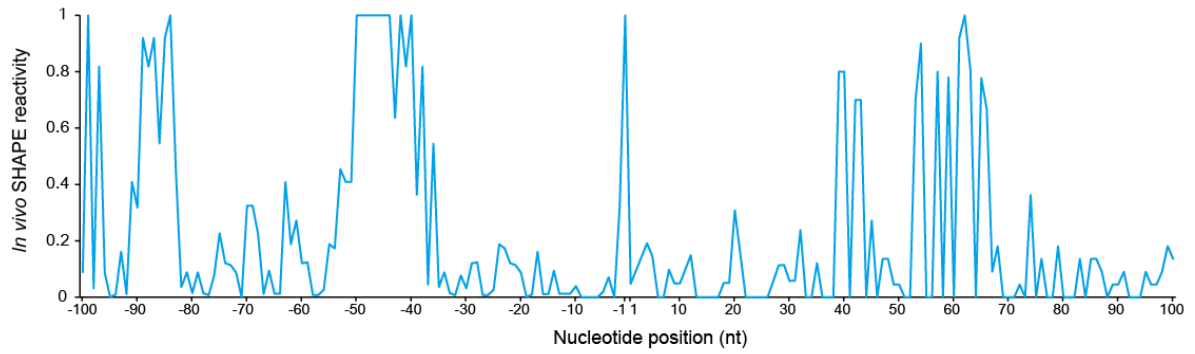

**Figure S12. The SHAPE reactivity values across the 5'ss of the first intron of *AT5G56870*.**

The x-axis represents the relative positions across the 5'ss.

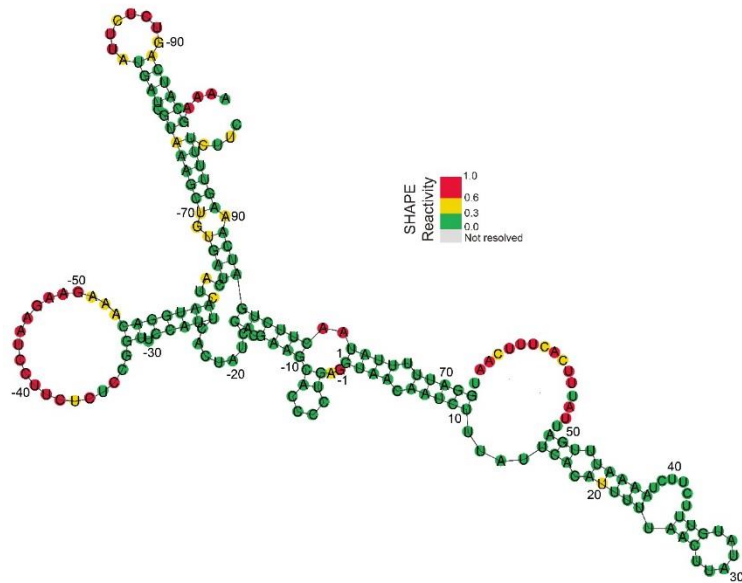

**Figure S13. Minimum free energy RNA structure at the 5'ss of *AT5G56780* intron 1 folded by *RNAfold*.**

The minimum free energy (MFE) RNA structure for the exon-intron region of *AT5G56780* intron 1 was generated by *RNAfold* program in *ViennaRNA* Package. The *in vivo* SHAPE reactivity values are color-coded and aligned to the MFE RNA structure (SHAPE reactivity 0.6-1.0 marked in red, 0.3-0.6 marked in yellow, 0-0.3 marked in green). The -1 and -2 positions are all single-stranded in the MFE RNA structure.

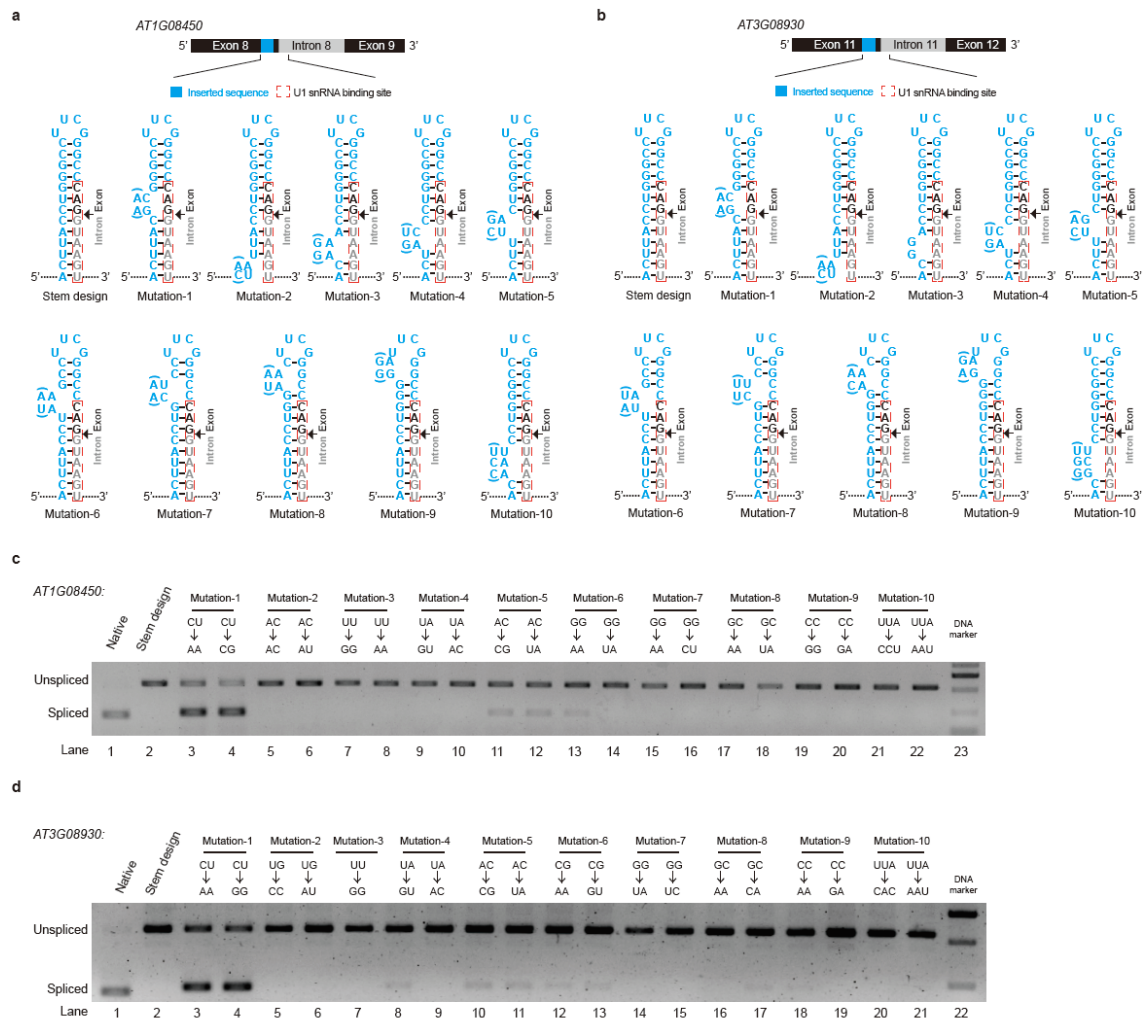

**Figure S14. The two-nucleotide single-stranded RNA structure feature at -1 and -2 nt positions upstream of 5'ss can regulate splicing on the genes *AT1G08450* and *AT3G08930***  
**a,b**, Schematic of experimental design to validate the effect of single-strandedness at the -1 and -2 positions of 5'ss on splicing of *AT1G08450* (**a**) and *AT3G08930* (**b**). A short sequence (blue) was inserted immediately upstream of the U1 snRNA binding site (red dashed box) to form a stable hairpin structure with the whole U1 binding site completely base-paired. The exon and intron sequences are colored in black and grey, respectively. A series of mutations were introduced at different positions of the inserted sequence to disrupt the base-pairing status of different nucleotides. Two types of mutations (with/without brackets) were designed for each position to avoid potential effects due to changing the sequence content. We introduced only one type of mutation for mutation-3 "GG" in *AT3G08930*, because the corresponding thermodynamic structure prediction shows that other types of mutations will lead to alternative long-distance interactions with flanking sequence content. **c,d**, Determination of splicing events by transient expression assay in *Nicotiana benthamiana*. The spliced and unspliced products were distinguished by semiquantitative RT-PCR using the same pair of primers located upstream and downstream of the intron. Spliced and unspliced products are indicated by bands with different sizes. The splicing events of *AT1G08450* (**c**) and *AT3G08930* (**d**) are shown. The constructs with native sequences were successfully spliced (lane 1). The splicing was completely inhibited in the stem design (lane 2). The mutations disrupted the base-pairing status at -1 and -2 positions upstream of 5'ss (Mutation-1) and rescued the splicing (lane 3 and 4). All other mutations (Mutation 2-10) did not rescue the splicing (lanes 5-22).

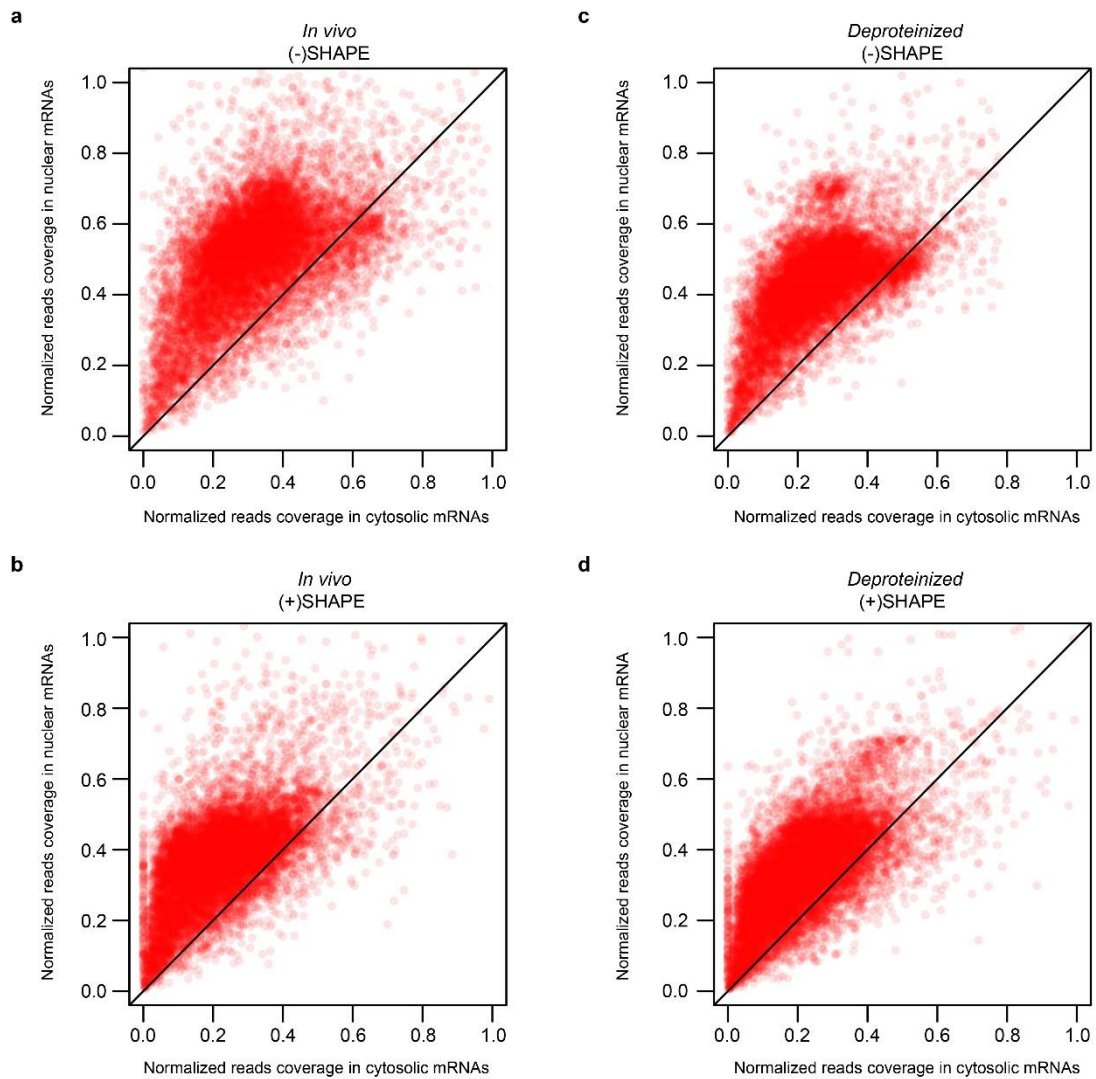

**Figure S15. Comparison of reads coverage across poly(A) site between nuclear and cytosolic mRNA libraries.**

To compare poly(A) site reads coverage between different libraries, reads coverage across the poly(A) site of each gene was normalized to the average reads coverage of the corresponding gene. Comparisons of normalized reads coverage between nuclear and cytosolic mRNAs in both (-)SHAPE and (+)SHAPE libraries for *in vivo* (a, b) and *deproteinized* (c, d) conditions. Higher reads coverage across the poly(A) sites in nuclear SHAPE-Structure-Seq libraries compared to cytosolic SHAPE-Structure-Seq libraries indicates the high enrichment of pre-mRNA before polyadenylation in nuclear mRNAs.



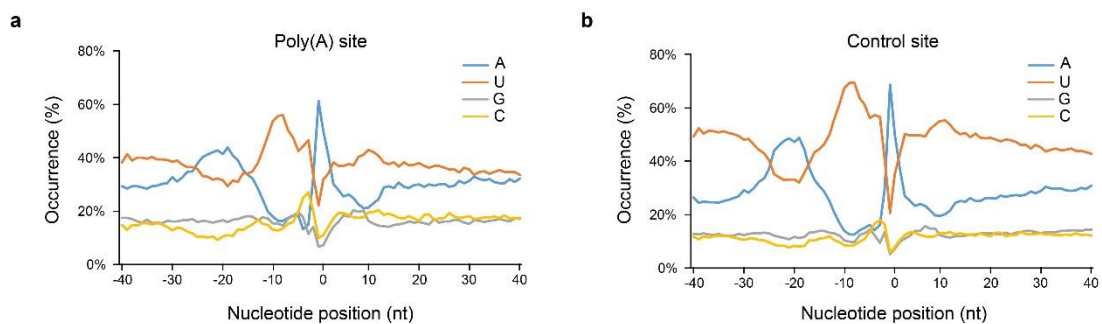

**Figure S16. Similar nucleotides composition between the poly(A) sites and the control sites.**  
**a,** Nucleotide composition profile across the poly(A) sites. **b,** Nucleotide composition profile across the control sites.

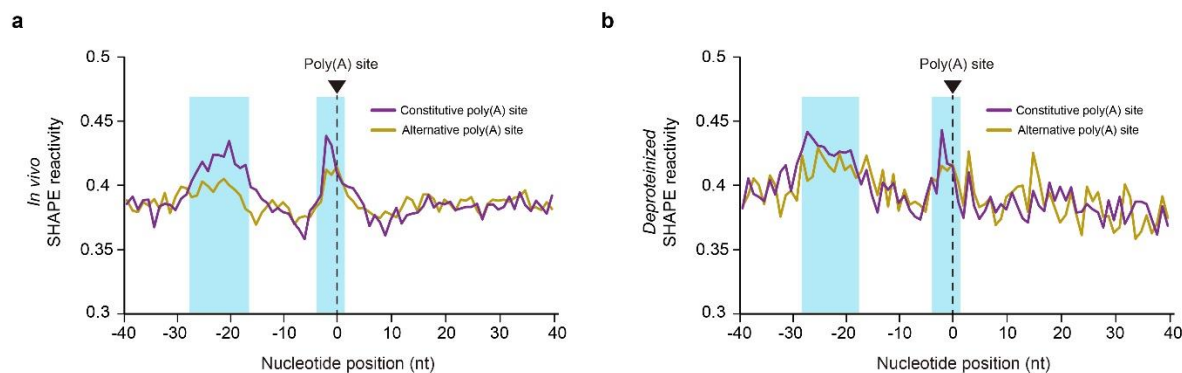

**Figure S17. A similar but weaker structure feature across the alternative polyadenylation sites.**

**a, b,** Average SHAPE reactivity profiles across both the constitutive poly(A) sites (purple) and alternative poly(A) (stone yellow) sites for *in vivo* (**a**) and *deproteinized* (**b**) conditions are shown. The X-axis represents the relative position to the poly(A) site. The average SHAPE reactivities in two regions (from -28 nt to -17 nt upstream of the poly(A) site and from -4 nt to +1 nt across the poly(A) site, shaded in light blue) across the constitutive poly(A) (purple) sites are similar with those across the alternative poly(A) (stone yellow) sites.

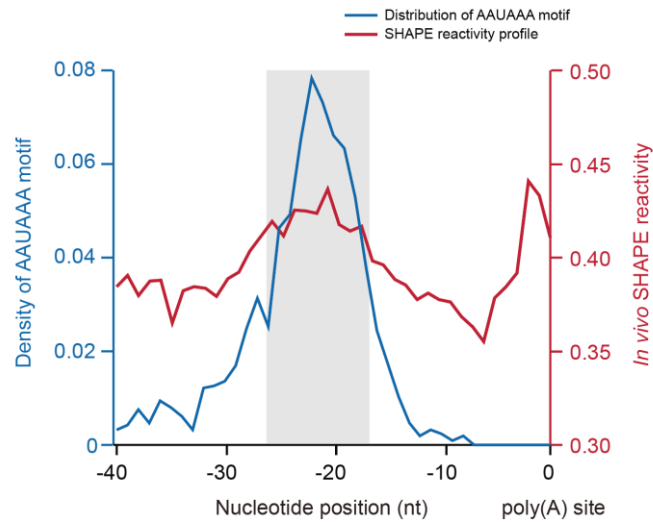

**Figure S18. An accumulation of the conventional polyadenylation signal (PAS) motif “AAUAAA” in the -28 nt to -17 nt upstream of the poly(A) sites.**

The “AAUAAA” motif distribution upstream of poly (A) sites is plotted as the blue line while *in vivo* SHAPE reactivity profile is plotted as the red line. An accumulation of the conventional polyadenylation signal (PAS) motif “AAUAAA” is in the -28 nt to -17 nt (shaded in light grey) upstream of the poly(A) sites.



**Table S1. Summary of reads mapping for each library.**

| Libraries                                     | Biological replicates | Sequencing depth | No. of mapped reads | % of mapped reads |
|-----------------------------------------------|-----------------------|------------------|---------------------|-------------------|
| Nuclear RNA ( <i>deproteinized</i> ) (+)SHAPE | 1                     | 339,824,973      | 233,350,092         | 69%               |
| Nuclear RNA ( <i>deproteinized</i> ) (+)SHAPE | 2                     | 361,592,757      | 244,657,771         | 68%               |
| Nuclear RNA ( <i>deproteinized</i> ) (-)SHAPE | 1                     | 169,654,866      | 147,979,243         | 87%               |
| Nuclear RNA ( <i>deproteinized</i> ) (-)SHAPE | 2                     | 167,190,546      | 146,873,727         | 88%               |
| Nuclear RNA ( <i>in vivo</i> ) (+)SHAPE       | 1                     | 341,438,706      | 283,762,996         | 83%               |
| Nuclear RNA ( <i>in vivo</i> ) (+)SHAPE       | 2                     | 296,287,026      | 247,523,784         | 84%               |
| Nuclear RNA ( <i>in vivo</i> ) (-)SHAPE       | 1                     | 447,447,740      | 372,396,093         | 83%               |
| Nuclear RNA ( <i>in vivo</i> ) (-)SHAPE       | 2                     | 342,500,235      | 294,505,102         | 86%               |
| Cytosolic RNA ( <i>in vivo</i> ) (+)SHAPE     | 1                     | 46,421,231       | 31,691,004          | 68%               |
| Cytosolic RNA ( <i>in vivo</i> ) (+)SHAPE     | 2                     | 58,082,808       | 38,195,080          | 66%               |
| Cytosolic RNA ( <i>in vivo</i> ) (-)SHAPE     | 1                     | 61,192,363       | 45,426,877          | 74%               |
| Cytosolic RNA ( <i>in vivo</i> ) (-)SHAPE     | 2                     | 59,907,555       | 40,821,132          | 68%               |

**Table S2. Comparison between SHAPE reactivity profiles and phylogenetic U1 and U12 snRNA structures.** True positive (proportion of single-stranded nucleotides in high SHAPE reactive nucleotides), true negative (proportion of double-stranded nucleotides in low SHAPE reactive nucleotides), false positive (proportion of double-stranded nucleotides in high SHAPE reactive nucleotides) and false negative (proportion of single-stranded nucleotides in low SHAPE reactive nucleotides) values were calculated and shown. Some reactive nucleotides that are annotated as base-paired in the phylogenetic structure but positioned either at the end of a helix or adjacent to a helical defect such as a bulge or loop, locations that are known to lead to flexibility. Values in parentheses, corrected for this positioning, show higher true positive and lower false positive percentages.

|                                       |                 | High SHAPE<br>reactivity (>0.6) | Low SHAPE<br>reactivity (<0.3) |
|---------------------------------------|-----------------|---------------------------------|--------------------------------|
| U1 snRNA<br>( <i>in vivo</i> )        | Single-stranded | 88% (96.0%)                     | 17.1%                          |
|                                       | Double-stranded | 12% (4.0%)                      | 82.9%                          |
| U12 snRNA<br>( <i>in vivo</i> )       | Single-stranded | 84.6% (92.3)                    | 26.2%                          |
|                                       | Double-stranded | 15.4% (7.7%)                    | 73.8%                          |
| U1 snRNA<br>( <i>deproteinized</i> )  | Single-stranded | 90.9% (95.5%)                   | 26.9%                          |
|                                       | Double-stranded | 9.1% (4.5%)                     | 73.1%                          |
| U12 snRNA<br>( <i>deproteinized</i> ) | Single-stranded | 88.5% (92.3%)                   | 19.6%                          |
|                                       | Double-stranded | 11.5% (7.7%)                    | 80.4%                          |

**Table S3. Summary of primer sequences**

Red underlined text indicates reverse index sequence. Blue underlined text indicates the mutated nucleotides.

| Primer name                                     | Sequence (5'-3')                                                          |
|-------------------------------------------------|---------------------------------------------------------------------------|
| DNA for 3'adapter ligation                      | /5rApp/AGATCGGAAGAGCACACGTCTG/3SpC3/                                      |
| DNA for library reverse transcription           | CAGACGTGTGCTCTTCCGATCT                                                    |
| DNA for 5'adapter ligation                      | /5Phos/AGATCGGAAGAGCGTCGTGTAGCTCTTCCGATCTNNNNNN/3SpC3/                    |
| Forward primer for sequencing Library           | AATGATACGGCGACCACCGAGATCTACACTCTTTCCCTACACGACGCTCTTCCGATCT                |
| Reverse primer for sequencing (Index2) Library  | CAAGCAGAAGACGGCATACGAGAT <u>ACATCG</u> GTGACTGGAGTTCAGACGTGTGCTCTTCCGATCT |
| Reverse primer for sequencing (Index3) Library  | CAAGCAGAAGACGGCATACGAGAT <u>GCCTAA</u> GTGACTGGAGTTCAGACGTGTGCTCTTCCGATCT |
| Reverse primer for sequencing (Index4) Library  | CAAGCAGAAGACGGCATACGAGAT <u>TGGTCA</u> GTGACTGGAGTTCAGACGTGTGCTCTTCCGATCT |
| Reverse primer for sequencing (Index5) Library  | CAAGCAGAAGACGGCATACGAGAT <u>CACTGT</u> GTGACTGGAGTTCAGACGTGTGCTCTTCCGATCT |
| Reverse primer for sequencing (Index6) Library  | CAAGCAGAAGACGGCATACGAGAT <u>ATTGGC</u> GTGACTGGAGTTCAGACGTGTGCTCTTCCGATCT |
| Reverse primer for sequencing (Index7) Library  | CAAGCAGAAGACGGCATACGAGAT <u>GATCTG</u> GTGACTGGAGTTCAGACGTGTGCTCTTCCGATCT |
| Reverse primer for sequencing (Index21) Library | CAAGCAGAAGACGGCATACGAGAT <u>CGAAAC</u> GTGACTGGAGTTCAGACGTGTGCTCTTCCGATCT |
| Reverse primer for sequencing (Index25) Library | CAAGCAGAAGACGGCATACGAGAT <u>ATCAGT</u> GTGACTGGAGTTCAGACGTGTGCTCTTCCGATCT |
| Forward primer <i>AT5G56870</i> Minigene        | AATCTGAGTTTTTCTGATTAACAGATGGTGATCATCAATGGAC                               |
| Reverse primer <i>AT5G56870</i> Minigene        | TTTTGGCGTCTTCCATCCCTCAITGTCCAGGAGAAGGT                                    |
| Forward primer <i>AT1G0845</i> Minigene         | AATCTGAGTTTTTCTGATTAACAGATGTTTGAAGATGATCCAGA                              |
| Reverse primer <i>AT1G0845</i> Minigene         | TTTTGGCGTCTTCCATCCCTTACTCCCTGTGTTGGGCA                                    |
| Forward primer <i>AT3G08930</i> Minigene        | AATCTGAGTTTTTCTGATTAACAGATGTGGGAGCTACTCTAAT                               |
| Reverse primer <i>AT3G08930</i> Minigene        | TTTTGGCGTCTTCCATCCCTGTAAAGGTACTTAATTCC                                    |
| Forward primer <i>AT5G56870_Semi-qPCR</i>       | AATCTGAGTTTTTCTGATTAACAGATGGTGATCATCAATGGAC                               |
| Reverse primer <i>AT5G56870_Semi-qPCR</i>       | TTTTGGCGTCTTCCATCCCTCAITGTCCAGGAGAAGGT                                    |
| Forward primer <i>AT1G0845_Semi-qPCR</i>        | ATGTTGAAGATGATCCAGA                                                       |
| Reverse primer <i>AT1G0845_Semi-qPCR</i>        | TTACTCCCTGTGTTGGGCA                                                       |
| Forward primer <i>AT3G08930_Semi-qPCR</i>       | ATGTGGGAGCTACTCTAAT                                                       |
| Reverse primer <i>AT3G08930_Semi-qPCR</i>       | TTGTAAGGTACTTAATTCC                                                       |
| Forward primer <i>AT5G56870_Mut1 CU-AA</i>      | CCCTTGTAC <u>AC</u> GGCCTTCGG                                             |
| Reverse primer <i>AT5G56870_Mut1 CU-AA</i>      | GTGCTTCGTGGATAGTGAATG                                                     |
| Forward primer <i>AT5G56870_Mut1 CU-GG</i>      | CCCTTGTAC <u>GG</u> GGCCTTCGG                                             |
| Reverse primer <i>AT5G56870_Mut1 CU-GG</i>      | GTGCTTCGTGGATAGTGAATG                                                     |
| Forward primer <i>AT5G56870_Mut2 UA-GU</i>      | CACCCCTTGT <u>G</u> CTCGGCCTT                                             |
| Reverse primer <i>AT5G56870_Mut2 UA-GU</i>      | CTTCGTGGATAGTGAATGG                                                       |
| Forward primer <i>AT5G56870_Mut2 UA-AC</i>      | CACCCCTTGT <u>AC</u> CTCGGCCTT                                            |
| Reverse primer <i>AT5G56870_Mut2 UA-AC</i>      | CTTCGTGGATAGTGAATGG                                                       |
| Forward primer <i>AT5G56870_Mut3 UU-GG</i>      | GCACCCCTT <u>GG</u> ACCTCGGCCT                                            |
| Reverse primer <i>AT5G56870_Mut3 UU-GG</i>      | TTCGTGGATAGTGAATGGAACC                                                    |
| Forward primer <i>AT5G56870_Mut3 UU-AC</i>      | GCACCCCTT <u>AC</u> ACCTCGGCCT                                            |
| Reverse primer <i>AT5G56870_Mut3 UU-AC</i>      | TTCGTGGATAGTGAATGGAACCG                                                   |
| Forward primer <i>AT5G56870_Mut4 UG-CC</i>      | AAGCACCCCT <u>C</u> CTACCTCGGC                                            |
| Reverse primer <i>AT5G56870_Mut4 UG-CC</i>      | CGTGGATAGTGAATGGAAC                                                       |
| Forward primer <i>AT5G56870_Mut4 UG-AU</i>      | AAGCACCCCT <u>ATT</u> ACCTCGGC                                            |
| Reverse primer <i>AT5G56870_Mut4 UG-AU</i>      | CGTGGATAGTGAATGGAAC                                                       |
| Forward primer <i>AT5G56870_Mut5 UUA-CAC</i>    | GCACCCCTT <u>CAC</u> CTCGGCCTT                                            |
| Reverse primer <i>AT5G56870_Mut5 UUA-CAC</i>    | TTCGTGGATAGTGAATGGAAC                                                     |
| Forward primer <i>AT5G56870_Mut5 UUA-AAU</i>    | GCACCCCTT <u>AAU</u> CTCGGCCTT                                            |
| Reverse primer <i>AT5G56870_Mut5 UUA-AAU</i>    | TTCGTGGATAGTGAATGGAAC                                                     |

## References

1. Wachter A, Tunc-Ozdemir M, Grove BC, Green PJ, Shintani DK, Breaker RR. Riboswitch control of gene expression in plants by splicing and alternative 3' end processing of mRNAs. *Plant Cell*. 2007;19(11):3437-3450.
2. Kwok CK, Ding Y, Tang Y, Assmann SM, Bevilacqua PC. Determination of in vivo RNA structure in low-abundance transcripts. *Nat Commun*. 2013;4(2971).
3. Lorenz R, Bernhart SH, Honer Zu Siederdisen C, Tafer H, Flamm C, Stadler PF, Hofacker IL. ViennaRNA Package 2.0. *Algorithms Mol Biol*. 2011;6(26).
